# Supplementary material for: Postprandial Glycemic Response to Whole Fruit versus Blended Fruit in Healthy, Young Adults
Source: MDPI journal article supplement (doi:10.3390/nu14214565), 2022-10-30
Supplement: s1 [file s1]

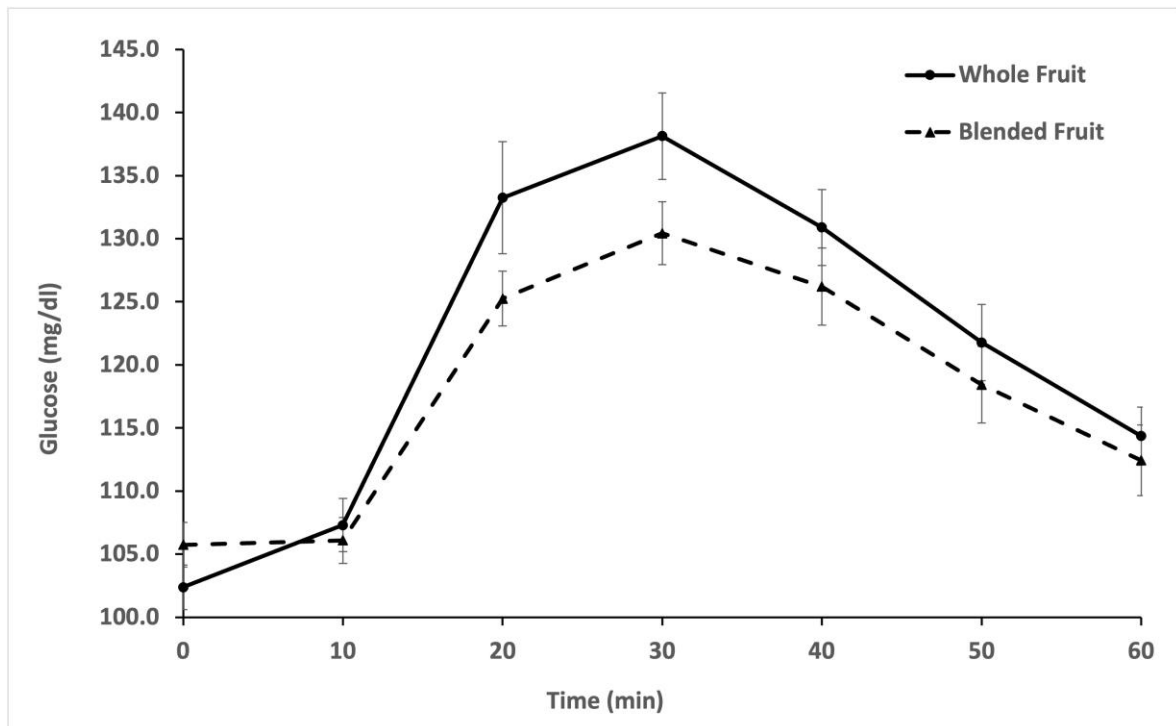

Figure S1. Mean incremental blood glucose values from 20 participants over 60 min, after consuming either whole fruit (solid line) or blended fruit (broken line). Error bars represent standard error of the mean (SEM).
